# Supplementary material for: DNA methylation epitypes highlight underlying developmental and disease pathways in acute myeloid leukemia
Source: HighWire-hosted journal article supplement (doi:10.1101/gr.269233.120), 2021-03-11
Supplement: Supplemental_Table_S5.xlsx [file Supplemental_Table_S5.xlsx]

## Sheet: README
Supplemental Table S5: Chromatin state enrichment in regions displaying aberrant hypermethylation.
Chromatin State Definitions:
State name	Description
1 TssP	Poised transcriptional start site
2 TssA	Active transcriptional start site
3 TssF	Flanking transcriptional start site
4 TxTrans	Transcriptional transition region
5 Tx	Transcribed region
6 EnhG	Genic enhancer region
7 Enh	Enhancer region
8 EnhP	Poised enhancer region
9 ReprPCWk	Weak polycomb repressed region
10 ReprPC	Polycomb repressed region
11 K9K27me3	H3K9me3, H3K27me3
12 Het	Heterochromatin
13 HetRpts	Heterochromatin, repetitive region
14 ZNF	Zinc Finger gene region
15 Quies	Quiescent region

## Sheet: E1
HSPC Donor	State name	Foreground overlapping	Foreground non-overlapping	Background overlapping	Background non-overlapping	P-value, uncorrected	P-value, FDR corrected	Fold change
1	1 TssP	1009	5505	6976	43023	0.000933608	0.00145876	1.09627
2	1 TssP	1347	5167	8739	41260	4.63204e-10	1.24073e-09	1.15864
3	1 TssP	710	5804	4529	45470	2.28329e-06	4.34421e-06	1.17574
1	2 TssA	523	5991	11705	38294	2.8622e-213	5.36662e-212	0.371062
2	2 TssA	102	6412	6974	43025	7.40353e-258	2.77632e-256	0.125058
3	2 TssA	1119	5395	15651	34348	2.93898e-133	4.40847e-132	0.578892
1	3 TssF	1471	5043	9632	40367	4.46466e-10	1.24018e-09	1.1494
2	3 TssF	2422	4092	16942	33057	1.54703e-07	3.41256e-07	1.08512
3	3 TssF	1274	5240	8382	41617	2.85802e-08	6.91455e-08	1.14465
1	4 TxTrans	41	6473	126	49873	2.31691e-06	4.34421e-06	2.12994
2	4 TxTrans	108	6406	294	49705	2.95901e-17	1.16803e-16	2.33076
3	4 TxTrans	62	6452	214	49785	2.21706e-07	4.61886e-07	1.94887
1	5 Tx	58	6456	430	49569	0.775987	0.797247	1.03112
2	5 Tx	30	6484	346	49653	0.0286012	0.0390017	0.692204
3	5 Tx	80	6434	534	49465	0.252341	0.286751	1.13037
1	6 EnhG	68	6446	238	49761	1.16696e-07	2.65219e-07	1.92792
2	6 EnhG	76	6438	291	49708	4.08094e-07	8.27218e-07	1.79659
3	6 EnhG	52	6462	154	49845	3.89424e-08	9.12712e-08	2.18996
1	7 Enh	855	5659	3556	46443	2.13206e-56	2.28435e-55	1.68163
2	7 Enh	524	5990	2574	47425	5.41782e-20	2.5396e-19	1.46741
3	7 Enh	655	5859	2776	47223	1.57762e-40	1.18321e-39	1.65623
1	8 EnhP	610	5904	3965	46034	9.07639e-05	0.000151273	1.15675
2	8 EnhP	621	5893	4087	45912	0.00024068	0.000392413	1.14434
3	8 EnhP	199	6315	1690	48309	0.175216	0.208591	0.913949
1	9 ReprPCWk	80	6434	1412	48587	1.26293e-16	4.73599e-16	0.465181
2	9 ReprPCWk	38	6476	1040	48959	2.56561e-21	1.37444e-20	0.30582
3	9 ReprPCWk	366	6148	3092	46907	0.0740666	0.0925833	0.918241
1	10 ReprPC	1116	5398	7321	42678	1.84115e-07	3.94531e-07	1.14756
2	10 ReprPC	849	5665	5604	44395	1.79755e-05	3.13526e-05	1.14142
3	10 ReprPC	1255	5259	7514	42485	4.96903e-18	2.07043e-17	1.24164
1	11 K9K27me3	314	6200	908	49091	1.12618e-43	9.3848e-43	2.22925
2	11 K9K27me3	242	6272	703	49296	1.66723e-33	1.13675e-32	2.22169
3	11 K9K27me3	149	6365	456	49543	2.40564e-19	1.06131e-18	2.13664
1	12 Het	8	6506	176	49823	0.00107803	0.00165005	0.377201
2	12 Het	15	6499	200	49799	0.0410594	0.0540256	0.605276
3	12 Het	21	6493	284	49715	0.0089271	0.0126327	0.597338
1	13 HetRpts	13	6501	124	49875	0.591	0.615625	0.823234
2	13 HetRpts	13	6501	184	49815	0.0327294	0.0438341	0.572503
3	13 HetRpts	41	6473	169	49830	0.00070795	0.00112971	1.69381
1	14 ZNF	4	6510	39	49960	0.813362	0.824353	0.807035
2	14 ZNF	11	6503	65	49934	0.372521	0.410869	1.25568
3	14 ZNF	2	6512	33	49966	0.425688	0.462704	0.49575
1	15 Quies	359	6155	3493	46506	6.02418e-06	1.07575e-05	0.808554
2	15 Quies	122	6392	2050	47949	8.78917e-22	5.07067e-21	0.487305
3	15 Quies	541	5973	4644	45355	0.00929104	0.0129042	0.90521

## Sheet: E2
HSPC Donor	State name	Foreground overlapping	Foreground non-overlapping	Background overlapping	Background non-overlapping	P-value, uncorrected	P-value, FDR corrected	Fold change
1	1 TssP	1825	5717	8762	51235	2.98343e-93	9.32323e-93	1.54368
2	1 TssP	2433	5109	10733	49264	3.11659e-173	1.79803e-172	1.65484
3	1 TssP	1419	6123	5642	54355	1.39587e-119	5.81612e-119	1.79963
1	10 ReprPC	1880	5662	7443	52554	5.00817e-167	2.50409e-166	1.8058
2	10 ReprPC	1401	6141	5549	54448	7.9119e-119	3.12312e-118	1.80518
3	10 ReprPC	2253	5289	7873	52124	5.03269e-272	5.39216e-271	1.99247
1	11 K9K27me3	682	6860	676	59321	4.17353e-287	5.21691e-286	4.49731
2	11 K9K27me3	544	6998	511	59486	3.40009e-235	2.55007e-234	4.61758
3	11 K9K27me3	363	7179	337	59660	2.7138e-157	1.2721e-156	4.64383
1	12 Het	23	7519	133	59864	0.160662	0.174632	1.3203
2	12 Het	26	7516	154	59843	0.155942	0.171995	1.29351
3	12 Het	60	7482	219	59778	7.67708e-07	1.19954e-06	1.92582
1	13 HetRpts	31	7511	95	59902	2.26765e-05	3.27065e-05	2.20323
2	13 HetRpts	40	7502	154	59843	0.000131733	0.000182963	1.8464
3	13 HetRpts	117	7425	122	59875	5.83828e-48	1.56382e-47	4.38385
1	14 ZNF	9	7533	36	59961	0.090372	0.10551	1.79101
2	14 ZNF	15	7527	61	59936	0.0266512	0.0333139	1.76744
3	14 ZNF	3	7539	33	59964	0.792799	0.792799	0.746254
1	15 Quies	266	7276	3321	56676	1.33179e-14	2.43621e-14	0.664077
2	15 Quies	92	7450	1810	58187	1.12356e-22	2.47845e-22	0.433157
3	15 Quies	348	7194	4509	55488	2.94795e-22	6.14157e-22	0.641622
1	2 TssA	507	7035	16811	43186	0	0	0.262167
2	2 TssA	145	7397	10380	49617	0	0	0.123371
3	2 TssA	1114	6428	21780	38217	0	0	0.435744
1	3 TssF	774	6768	12325	47672	2.22704e-114	7.95372e-114	0.52914
2	3 TssF	1452	6090	21609	38388	3.47914e-200	2.17446e-199	0.563841
3	3 TssF	739	6803	10608	49389	1.03006e-74	3.09019e-74	0.583219
1	4 TxTrans	32	7510	141	59856	0.00497022	0.00631807	1.65643
2	4 TxTrans	59	7483	356	59641	0.050655	0.0612762	1.27313
3	4 TxTrans	41	7501	246	59751	0.109335	0.122389	1.27929
1	5 Tx	20	7522	411	59586	2.3709e-06	3.62893e-06	0.415548
2	5 Tx	8	7534	345	59652	4.95979e-10	8.45419e-10	0.202947
3	5 Tx	19	7523	500	59497	7.49583e-10	1.22215e-09	0.327834
1	6 EnhG	20	7522	238	59759	0.0914419	0.10551	0.69419
2	6 EnhG	23	7519	283	59714	0.0447474	0.0550173	0.673092
3	6 EnhG	12	7530	169	59828	0.0575556	0.0685186	0.593705
1	7 Enh	391	7151	3887	56110	8.91292e-06	1.31072e-05	0.818472
2	7 Enh	272	7270	2708	57289	0.000224077	0.000305559	0.817374
3	7 Enh	311	7231	3143	56854	2.45232e-05	3.47027e-05	0.806318
1	8 EnhP	1035	6507	4474	55523	5.22273e-68	1.50656e-67	1.68242
2	8 EnhP	1019	6523	4498	55499	5.73773e-63	1.59381e-62	1.65401
3	8 EnhP	362	7180	1923	58074	7.36331e-12	1.31488e-11	1.4187
1	9 ReprPCWk	62	7480	1370	58627	2.0674e-20	4.08039e-20	0.387719
2	9 ReprPCWk	25	7517	961	59036	2.58974e-24	6.06971e-24	0.227055
3	9 ReprPCWk	397	7145	3047	56950	0.487557	0.500915	1.03228

## Sheet: E3
HSPC Donor	State name	Foreground overlapping	Foreground non-overlapping	Background overlapping	Background non-overlapping	P-value, uncorrected	P-value, FDR corrected	Fold change
1	1 TssP	474	2275	6817	43181	2.30448e-07	5.95987e-07	1.24742
2	1 TssP	633	2116	8661	41337	1.40983e-13	5.28687e-13	1.30684
3	1 TssP	345	2404	4422	45576	2.92087e-10	9.12773e-10	1.38866
1	10 ReprPC	484	2265	7452	42546	0.000154739	0.000290135	1.17022
2	10 ReprPC	394	2355	5697	44301	5.56704e-06	1.30477e-05	1.24117
3	10 ReprPC	597	2152	7639	42359	4.44181e-18	2.37954e-17	1.39085
1	11 K9K27me3	308	2441	882	49116	1.11852e-127	8.38888e-126	4.96623
2	11 K9K27me3	242	2507	709	49289	4.27899e-98	1.06975e-96	4.88268
3	11 K9K27me3	152	2597	452	49546	7.45863e-61	6.99246e-60	4.82869
1	12 Het	7	2742	164	49834	0.607723	0.660568	0.785462
2	12 Het	13	2736	205	49793	0.543016	0.607853	1.14422
3	12 Het	24	2725	263	49735	0.0225833	0.0313657	1.60455
1	13 HetRpts	17	2732	107	49891	0.000249458	0.000445461	2.63057
2	13 HetRpts	19	2730	175	49823	0.00846466	0.0135074	1.87921
3	13 HetRpts	55	2694	160	49838	3.30532e-23	2.06583e-22	4.90848
1	14 ZNF	5	2744	44	49954	0.110606	0.140601	1.95793
2	14 ZNF	12	2737	65	49933	0.000613776	0.00104621	2.99029
3	14 ZNF	2	2747	34	49964	0.711784	0.751884	1.06598
1	15 Quies	109	2640	3617	46381	2.77677e-12	9.46626e-12	0.561315
2	15 Quies	36	2713	2057	47941	8.13378e-17	4.06689e-16	0.330032
3	15 Quies	140	2609	4873	45125	2.49291e-18	1.43822e-17	0.535862
1	2 TssA	201	2548	11064	38934	5.3185e-94	9.97218e-93	0.342364
2	2 TssA	42	2707	6450	43548	2.45595e-103	9.2098e-102	0.124135
3	2 TssA	491	2258	14836	35162	9.38279e-44	7.03709e-43	0.614678
1	3 TssF	522	2227	9747	40251	0.536269	0.607853	0.975361
2	3 TssF	831	1918	17129	32869	1.27931e-05	2.82201e-05	0.887805
3	3 TssF	423	2326	8587	41411	0.0154715	0.0227522	0.900821
1	4 TxTrans	29	2720	139	49859	1.33886e-08	3.58622e-08	3.31216
2	4 TxTrans	55	2694	349	49649	9.53159e-11	3.10813e-10	2.61219
3	4 TxTrans	36	2713	236	49762	3.09967e-07	7.74917e-07	2.53955
1	5 Tx	13	2736	471	49527	0.00978521	0.0149774	0.515372
2	5 Tx	5	2744	407	49591	2.95247e-05	6.32673e-05	0.23286
3	5 Tx	20	2729	571	49427	0.0497393	0.0654464	0.64933
1	6 EnhG	25	2724	277	49721	0.0258622	0.0352667	1.58839
2	6 EnhG	21	2728	320	49678	0.392909	0.453357	1.18165
3	6 EnhG	15	2734	201	49797	0.279339	0.32735	1.33248
1	7 Enh	249	2500	3895	46103	0.0179142	0.0258378	1.15293
2	7 Enh	166	2583	2740	47258	0.213017	0.257681	1.09606
3	7 Enh	214	2535	3023	46975	0.000375909	0.000655656	1.26851
1	8 EnhP	281	2468	4013	45985	6.88379e-05	0.000143412	1.25565
2	8 EnhP	272	2477	4088	45910	0.00195046	0.00325077	1.19703
3	8 EnhP	77	2672	1663	48335	0.138704	0.17338	0.849111
1	9 ReprPCWk	32	2717	1412	48586	9.3337e-09	2.69241e-08	0.425212
2	9 ReprPCWk	11	2738	1046	48952	2.39718e-13	8.56137e-13	0.199683
3	9 ReprPCWk	166	2583	3153	46845	0.600064	0.660568	0.959674

## Sheet: E4
HSPC Donor	State name	Foreground overlapping	Foreground non-overlapping	Background overlapping	Background non-overlapping	P-value, uncorrected	P-value, FDR corrected	Fold change
1	1 TssP	3245	10043	6583	43414	2.3916e-203	1.993e-202	1.5725
2	1 TssP	4097	9191	8207	41790	1.65916e-280	2.48874e-279	1.58585
3	1 TssP	2143	11145	4317	45680	1.53622e-128	1.15217e-127	1.5799
1	10 ReprPC	2355	10933	6837	43160	9.72031e-31	2.5543e-30	1.22017
2	10 ReprPC	1623	11665	5311	44686	2.50007e-07	4.80782e-07	1.11475
3	10 ReprPC	2965	10323	6931	43066	3.88641e-117	2.42901e-116	1.42694
1	11 K9K27me3	596	12692	717	49280	7.60831e-89	4.07588e-88	2.16184
2	11 K9K27me3	465	12823	583	49414	1.49904e-65	7.02676e-65	2.11316
3	11 K9K27me3	310	12978	367	49630	1.42838e-47	5.35643e-47	2.18079
1	12 Het	15	13273	142	49855	0.000174346	0.000290576	0.455022
2	12 Het	23	13265	176	49821	0.000635124	0.0010135	0.550448
3	12 Het	47	13241	262	49735	0.0115808	0.0160845	0.724404
1	13 HetRpts	31	13257	109	49888	0.755247	0.782879	1.05457
2	13 HetRpts	35	13253	163	49834	0.29396	0.344485	0.841868
3	13 HetRpts	108	13180	125	49872	5.52296e-18	1.25522e-17	2.20754
1	14 ZNF	13	13275	32	49965	0.20029	0.246258	1.37585
2	14 ZNF	25	13263	57	49940	0.0413015	0.0534071	1.452
3	14 ZNF	8	13280	27	49970	0.835224	0.84651	1.08859
1	15 Quies	467	12821	3336	46661	4.08e-47	1.45714e-46	0.584833
2	15 Quies	184	13104	1881	48116	6.04795e-51	2.38735e-50	0.424364
3	15 Quies	877	12411	4337	45660	2.63072e-15	5.63726e-15	0.801069
1	2 TssA	1053	12235	13126	36871	0	0	0.353691
2	2 TssA	273	13015	8047	41950	0	0	0.156272
3	2 TssA	2550	10738	16883	33114	1.30991e-245	1.22804e-244	0.624945
1	3 TssF	2492	10796	9869	40128	0.0108326	0.0153291	0.960142
2	3 TssF	3898	9390	17606	32391	1.15729e-37	3.47187e-37	0.863304
3	3 TssF	2000	11288	8727	41270	3.51827e-11	6.94396e-11	0.887959
1	4 TxTrans	56	13232	143	49854	0.0181868	0.02393	1.34022
2	4 TxTrans	116	13172	302	49695	0.00110169	0.00168625	1.32167
3	4 TxTrans	62	13226	231	49766	0.942709	0.942709	1.00778
1	5 Tx	60	13228	418	49579	1.94663e-06	3.64993e-06	0.597812
2	5 Tx	44	13244	334	49663	2.40395e-06	4.29276e-06	0.554373
3	5 Tx	93	13195	503	49494	0.000998377	0.00155996	0.743152
1	6 EnhG	50	13238	243	49754	0.113322	0.141652	0.812725
2	6 EnhG	65	13223	277	49720	0.387327	0.440144	0.905166
3	6 EnhG	35	13253	161	49836	0.333563	0.38488	0.850459
1	7 Enh	902	12386	3541	46456	0.243973	0.295128	0.966877
2	7 Enh	608	12680	2493	47504	0.0518672	0.0659328	0.933777
3	7 Enh	726	12562	2776	47221	0.70088	0.775578	0.987328
1	8 EnhP	1860	11428	3626	46371	7.08634e-120	4.8316e-119	1.61472
2	8 EnhP	1789	11499	3651	46346	9.49517e-102	5.47798e-101	1.56622
3	8 EnhP	751	12537	1480	48517	2.26352e-45	7.71655e-45	1.60318
1	9 ReprPCWk	133	13155	1375	48622	7.29235e-38	2.27886e-37	0.420041
2	9 ReprPCWk	69	13219	1001	48996	3.28266e-40	1.07043e-39	0.307119
3	9 ReprPCWk	651	12637	2981	47016	2.08721e-06	3.81807e-06	0.853643

## Sheet: E5
HSPC Donor	State name	Foreground overlapping	Foreground non-overlapping	Background overlapping	Background non-overlapping	P-value, uncorrected	P-value, FDR corrected	Fold change
1	1 TssP	100	637	7374	42628	0.402157	0.494455	0.921131
2	1 TssP	132	605	9247	40755	0.737907	0.802073	0.968929
3	1 TssP	53	684	4814	45188	0.0271514	0.0452523	0.749702
1	10 ReprPC	174	563	7318	42684	1.78316e-10	6.68686e-10	1.59892
2	10 ReprPC	155	582	5483	44519	4.34184e-15	2.03524e-14	1.8927
3	10 ReprPC	213	524	7838	42164	2.92708e-19	1.56808e-18	1.8214
1	11 K9K27me3	158	579	868	49134	2.70176e-113	2.02632e-111	10.6019
2	11 K9K27me3	129	608	678	49324	7.01014e-94	2.6288e-92	11.005
3	11 K9K27me3	77	660	464	49538	8.48764e-52	1.59143e-50	9.79869
1	12 Het	3	734	115	49887	0.245819	0.335208	1.7503
2	12 Het	5	732	139	49863	0.0596584	0.096823	2.39046
3	12 Het	13	724	187	49815	8.52185e-06	2.13046e-05	4.47495
1	13 HetRpts	11	726	85	49917	1.62498e-07	4.68745e-07	7.88853
2	13 HetRpts	10	727	126	49876	3.2392e-05	7.14529e-05	5.06216
3	13 HetRpts	31	706	152	49850	8.04754e-24	5.02971e-23	11.6623
1	14 ZNF	4	733	29	49973	0.00129278	0.00248612	8.34489
2	14 ZNF	6	731	50	49952	0.000161181	0.000335794	7.37628
3	14 ZNF	4	733	27	49975	0.00101714	0.00206176	8.88327
1	15 Quies	9	728	2847	47155	8.51926e-10	3.04259e-09	0.21695
2	15 Quies	6	731	1475	48527	0.000145338	0.000311438	0.278914
3	15 Quies	21	716	3800	46202	6.90966e-08	2.15927e-07	0.37837
1	2 TssA	46	691	11690	38312	1.92177e-35	2.40222e-34	0.269844
2	2 TssA	16	721	6882	43120	7.37125e-28	5.02585e-27	0.159688
3	2 TssA	102	635	15765	34237	3.35034e-28	2.51276e-27	0.442568
1	3 TssF	94	643	10193	39809	9.78493e-08	2.93548e-07	0.629091
2	3 TssF	172	565	17676	32326	3.52237e-12	1.39041e-11	0.663458
3	3 TssF	84	653	8899	41103	2.26541e-06	6.06807e-06	0.643772
1	4 TxTrans	2	735	129	49873	0.715971	0.791224	1.05107
2	4 TxTrans	3	734	350	49652	0.499781	0.59741	0.585088
3	4 TxTrans	3	734	236	49766	1	1	0.864167
1	5 Tx	2	735	303	49699	0.336728	0.42843	0.451445
2	5 Tx	1	736	240	49762	0.273809	0.366708	0.285665
3	5 Tx	5	732	389	49613	1	1	0.873672
1	6 EnhG	6	731	233	49769	0.166746	0.240499	1.72833
2	6 EnhG	6	731	237	49765	0.172729	0.244428	1.69988
3	6 EnhG	5	732	153	49849	0.0814009	0.122101	2.17865
1	7 Enh	71	666	3588	46414	0.014449	0.024629	1.33589
2	7 Enh	27	710	2379	47623	0.189619	0.263359	0.772578
3	7 Enh	52	685	2843	47159	0.109865	0.161566	1.2366
1	8 EnhP	55	682	4204	45798	0.384734	0.480917	0.889057
2	8 EnhP	69	668	4367	45635	0.554086	0.64932	1.07086
3	8 EnhP	14	723	1830	48172	0.00949471	0.0165605	0.522687
1	9 ReprPCWk	2	735	1132	48870	1.41836e-05	3.43151e-05	0.12142
2	9 ReprPCWk	0	737	773	49229	2.36126e-05	5.5342e-05	0
3	9 ReprPCWk	61	676	2727	47275	0.0018629	0.00349294	1.5063

## Sheet: E6
HSPC Donor	State name	Foreground overlapping	Foreground non-overlapping	Background overlapping	Background non-overlapping	P-value, uncorrected	P-value, FDR corrected	Fold change
1	1 TssP	342	1735	5229	34770	1.54743e-05	4.6423e-05	1.24363
2	1 TssP	416	1661	6764	33235	0.000293357	0.000709735	1.17373
3	1 TssP	215	1862	3444	36555	0.0074064	0.0132257	1.19035
1	10 ReprPC	377	1700	6444	33555	0.0158211	0.0269677	1.11967
2	10 ReprPC	280	1797	4963	35036	0.152371	0.206025	1.08187
3	10 ReprPC	401	1676	6504	33495	0.000334155	0.000759444	1.17646
1	11 K9K27me3	130	1947	836	39163	2.84574e-25	4.26861e-24	2.72624
2	11 K9K27me3	111	1966	649	39350	1.25722e-24	1.57153e-23	2.95874
3	11 K9K27me3	54	2023	416	39583	1.01747e-08	5.08733e-08	2.32752
1	12 Het	2	2075	132	39867	0.069708	0.104562	0.302359
2	12 Het	3	2074	172	39827	0.0516853	0.0801813	0.347281
3	12 Het	6	2071	233	39766	0.0972438	0.140255	0.508571
1	13 HetRpts	8	2069	90	39909	0.153832	0.206025	1.65372
2	13 HetRpts	4	2073	153	39846	0.197316	0.259626	0.516129
3	13 HetRpts	34	2043	145	39854	1.24595e-11	9.3446e-11	3.8479
1	14 ZNF	2	2075	35	39964	0.704766	0.753709	1.09503
2	14 ZNF	10	2067	55	39944	0.00125599	0.00254592	3.11663
3	14 ZNF	2	2075	30	39969	0.671089	0.729445	1.26613
1	15 Quies	61	2016	3103	36896	9.99252e-20	9.36798e-19	0.390563
2	15 Quies	38	2039	1752	38247	6.31209e-10	3.38148e-09	0.430059
3	15 Quies	150	1927	4114	35885	3.01009e-06	1.07503e-05	0.712643
1	2 TssA	205	1872	7892	32107	7.25284e-33	1.35991e-31	0.512894
2	2 TssA	48	2029	4458	35541	1.7893e-50	6.70987e-49	0.215798
3	2 TssA	450	1627	10902	29097	1.29381e-08	6.06472e-08	0.803042
1	3 TssF	504	1573	7823	32176	3.06888e-07	1.35392e-06	1.22614
2	3 TssF	783	1294	13645	26354	0.000899919	0.00187483	1.09939
3	3 TssF	389	1688	6830	33169	0.0523851	0.0801813	1.09162
1	4 TxTrans	16	2061	134	39865	0.00362412	0.00665145	2.16086
2	4 TxTrans	30	2047	315	39684	0.00257565	0.00495317	1.76157
3	4 TxTrans	28	2049	209	39790	2.48973e-05	7.18193e-05	2.39336
1	5 Tx	7	2070	366	39633	0.00363613	0.00665145	0.380178
2	5 Tx	3	2074	293	39706	0.000389928	0.000860136	0.205318
3	5 Tx	16	2061	467	39532	0.111904	0.158355	0.671075
1	6 EnhG	13	2064	240	39759	0.883679	0.895621	1.04093
2	6 EnhG	18	2059	261	39738	0.264358	0.33172	1.30697
3	6 EnhG	12	2065	146	39853	0.136566	0.189674	1.53859
1	7 Enh	177	1900	3316	36683	0.713512	0.753709	1.02653
2	7 Enh	83	1994	2360	37639	0.000170336	0.000425841	0.68826
3	7 Enh	121	1956	2625	37374	0.201856	0.261021	0.892653
1	8 EnhP	220	1857	3221	36778	6.66762e-05	0.000178597	1.2952
2	8 EnhP	243	1834	3376	36623	7.48068e-07	3.11695e-06	1.36024
3	8 EnhP	77	2000	1307	38692	0.282952	0.347892	1.12707
1	9 ReprPCWk	17	2060	1224	38775	1.02862e-11	8.57184e-11	0.277508
2	9 ReprPCWk	9	2068	858	39141	3.25291e-10	1.87668e-09	0.210291
3	9 ReprPCWk	129	1948	2729	37270	0.303509	0.367148	0.914377

## Sheet: E7
HSPC Donor	State name	Foreground overlapping	Foreground non-overlapping	Background overlapping	Background non-overlapping	P-value, uncorrected	P-value, FDR corrected	Fold change
1	1 TssP	172	843	5468	34529	0.00360478	0.00750995	1.23224
2	1 TssP	219	796	6997	33000	0.000966529	0.00219666	1.22629
3	1 TssP	112	903	3607	36390	0.0307233	0.0535872	1.21685
1	10 ReprPC	207	808	6181	33816	3.63824e-05	9.74527e-05	1.30933
2	10 ReprPC	169	846	4739	35258	9.78076e-06	2.82137e-05	1.39132
3	10 ReprPC	255	760	6388	33609	1.58153e-13	9.1242e-13	1.55103
1	11 K9K27me3	179	836	777	39220	1.182e-103	8.865e-102	7.56554
2	11 K9K27me3	146	869	612	39385	9.14001e-86	2.285e-84	7.78267
3	11 K9K27me3	77	938	390	39607	4.48462e-40	6.72694e-39	6.66222
1	12 Het	3	1012	119	39878	1	1	0.993588
2	12 Het	7	1008	154	39843	0.123589	0.185383	1.75678
3	12 Het	10	1005	220	39777	0.0826343	0.131863	1.75678
1	13 HetRpts	9	1006	81	39916	0.000395976	0.000928069	4.04059
2	13 HetRpts	9	1006	138	39859	0.0111999	0.0209999	2.47383
3	13 HetRpts	39	976	148	39849	9.19088e-25	6.89316e-24	8.4269
1	14 ZNF	1	1014	28	39969	0.516643	0.654795	1.39331
2	14 ZNF	6	1009	57	39940	0.00463923	0.00915638	3.84818
3	14 ZNF	1	1014	27	39970	0.504368	0.6522	1.44307
1	15 Quies	19	996	2850	37147	8.22774e-14	5.14234e-13	0.267589
2	15 Quies	12	1003	1608	38389	1.96759e-07	6.41606e-07	0.299303
3	15 Quies	38	977	3809	36188	4.16588e-12	1.95275e-11	0.399123
1	2 TssA	88	927	8372	31625	2.05428e-25	1.7119e-24	0.420298
2	2 TssA	28	987	4805	35192	5.02389e-26	5.38274e-25	0.234092
3	2 TssA	192	823	11413	28584	3.76794e-12	1.88397e-11	0.668499
1	3 TssF	190	825	7863	32134	0.471662	0.620608	0.953325
2	3 TssF	276	739	13670	26327	2.55514e-06	7.66541e-06	0.799658
3	3 TssF	136	879	6854	33143	0.00150647	0.00322814	0.786152
1	4 TxTrans	2	1013	120	39877	0.772834	0.878221	0.662392
2	4 TxTrans	7	1008	289	39708	1	1	0.955545
3	4 TxTrans	5	1010	199	39798	1	1	0.990341
1	5 Tx	3	1012	344	39653	0.0538609	0.0897682	0.349331
2	5 Tx	2	1013	298	39699	0.0383124	0.0653053	0.269373
3	5 Tx	6	1009	451	39546	0.127928	0.188129	0.530493
1	6 EnhG	6	1009	216	39781	0.826237	0.911291	1.09205
2	6 EnhG	7	1008	241	39756	0.678933	0.783385	1.14049
3	6 EnhG	4	1011	147	39850	0.790814	0.885239	1.07036
1	7 Enh	37	978	3202	36795	3.36132e-08	1.1459e-07	0.461568
2	7 Enh	18	997	2274	37723	1.14284e-09	4.51122e-09	0.317324
3	7 Enh	42	973	2530	37467	0.00381465	0.00773241	0.659817
1	8 EnhP	89	926	3319	36678	0.565157	0.683657	1.0552
2	8 EnhP	108	907	3401	36596	0.0196478	0.0350854	1.24361
3	8 EnhP	31	984	1397	38600	0.543175	0.667838	0.877159
1	9 ReprPCWk	11	1004	1150	38847	0.000236049	0.000571085	0.382829
2	9 ReprPCWk	2	1013	785	39212	1.13361e-06	3.54253e-06	0.102683
3	9 ReprPCWk	70	945	2511	37486	0.431803	0.578307	1.09586

## Sheet: E8
HSPC Donor	State name	Foreground overlapping	Foreground non-overlapping	Background overlapping	Background non-overlapping	P-value, uncorrected	P-value, FDR corrected	Fold change
1	1 TssP	2101	6438	6742	43255	1.87239e-138	1.75536e-137	1.62871
2	1 TssP	2713	5826	8467	41530	1.01777e-204	1.52666e-203	1.6635
3	1 TssP	1416	7123	4385	45612	5.15797e-97	2.97575e-96	1.67331
1	10 ReprPC	1779	6760	6918	43079	1.09462e-58	4.10481e-58	1.40224
2	10 ReprPC	1213	7326	5363	44634	6.34764e-20	1.28668e-19	1.26449
3	10 ReprPC	2167	6372	7176	42821	2.63978e-131	1.97983e-130	1.58997
1	11 K9K27me3	464	8075	747	49250	9.30695e-94	4.98587e-93	2.62658
2	11 K9K27me3	362	8177	569	49428	3.85207e-75	1.80566e-74	2.66548
3	11 K9K27me3	236	8303	381	49616	7.79127e-48	2.54063e-47	2.62206
1	12 Het	6	8533	131	49866	0.000224529	0.000336794	0.300225
2	12 Het	12	8527	144	49853	0.012117	0.0159434	0.527318
3	12 Het	31	8508	222	49775	0.326361	0.388525	0.839957
1	13 HetRpts	19	8520	102	49895	0.699258	0.794612	1.07643
2	13 HetRpts	24	8515	147	49850	0.913825	0.951901	0.962124
3	13 HetRpts	75	8464	135	49862	2.63602e-14	5.06927e-14	2.44826
1	14 ZNF	17	8522	32	49965	0.00036116	0.000531118	2.37831
2	14 ZNF	24	8515	50	49947	9.28054e-05	0.000142049	2.22329
3	14 ZNF	12	8527	24	49973	0.00377158	0.00514306	2.28505
1	15 Quies	168	8371	3175	46822	1.34147e-73	5.91826e-73	0.3445
2	15 Quies	72	8467	1718	48279	1.78846e-49	6.09703e-49	0.275737
3	15 Quies	411	8128	4159	45838	4.30864e-32	1.1143e-31	0.616512
1	2 TssA	693	7846	12687	37310	0	0	0.355053
2	2 TssA	166	8373	7635	42362	0	0	0.145873
3	2 TssA	1704	6835	16508	33489	3.03478e-137	2.52898e-136	0.641399
1	3 TssF	1571	6968	10016	39981	0.000444183	0.000640648	0.92944
2	3 TssF	2337	6202	17823	32174	1.41407e-51	5.05023e-51	0.794665
3	3 TssF	1175	7364	8871	41126	2.99443e-20	6.2384e-20	0.80179
1	4 TxTrans	24	8515	133	49864	0.820616	0.87335	1.04792
2	4 TxTrans	65	8474	313	49684	0.164326	0.198781	1.17879
3	4 TxTrans	39	8500	215	49782	0.72154	0.807695	1.05256
1	5 Tx	18	8521	361	49636	1.24254e-09	2.16721e-09	0.325574
2	5 Tx	13	8526	294	49703	5.32759e-09	9.08113e-09	0.290283
3	5 Tx	35	8504	462	49535	2.68885e-07	4.29072e-07	0.482756
1	6 EnhG	28	8511	249	49748	0.0328102	0.0417079	0.692938
2	6 EnhG	31	8508	276	49721	0.0231856	0.0299813	0.692212
3	6 EnhG	28	8511	154	49843	0.752276	0.829716	1.05464
1	7 Enh	347	8192	3694	46303	1.09661e-32	2.93736e-32	0.588649
2	7 Enh	197	8342	2536	47461	6.64842e-34	1.84678e-33	0.494132
3	7 Enh	293	8246	2933	47064	5.79304e-22	1.3166e-21	0.622615
1	8 EnhP	1266	7273	3827	46170	2.6737e-91	1.33685e-90	1.70403
2	8 EnhP	1295	7244	3823	46174	2.17075e-99	1.35672e-98	1.73454
3	8 EnhP	511	8028	1629	48368	4.94357e-31	1.23589e-30	1.6369
1	9 ReprPCWk	67	8472	1283	48714	2.92514e-30	7.07695e-30	0.340218
2	9 ReprPCWk	25	8514	926	49071	4.95473e-36	1.48642e-35	0.180209
3	9 ReprPCWk	427	8112	2868	47129	0.0060696	0.00812892	0.888359

## Sheet: E9
HSPC Donor	State name	Foreground overlapping	Foreground non-overlapping	Background overlapping	Background non-overlapping	P-value, uncorrected	P-value, FDR corrected	Fold change
1	1 TssP	518	4677	5011	34987	6.47453e-08	1.4282e-07	0.815021
2	1 TssP	714	4481	6512	33486	2.02563e-06	3.79806e-06	0.859579
3	1 TssP	372	4823	3274	36724	0.0101029	0.0142966	0.887589
1	10 ReprPC	653	4542	6793	33205	1.02215e-16	3.48459e-16	0.762914
2	10 ReprPC	466	4729	5307	34691	1.0862e-19	4.52583e-19	0.702215
3	10 ReprPC	609	4586	6675	33323	2.88134e-21	1.27118e-20	0.727332
1	11 K9K27me3	139	5056	927	39071	0.108974	0.138526	1.13434
2	11 K9K27me3	110	5085	738	39260	0.174224	0.204169	1.12845
3	11 K9K27me3	61	5134	455	39543	0.781549	0.804945	1.02841
1	12 Het	6	5189	200	39798	1.41446e-05	2.41102e-05	0.253378
2	12 Het	7	5188	238	39760	1.56003e-06	3.00006e-06	0.248552
3	12 Het	11	5184	332	39666	5.30615e-08	1.22796e-07	0.278987
1	13 HetRpts	9	5186	144	39854	0.0298144	0.0399299	0.511725
2	13 HetRpts	8	5187	232	39766	9.52649e-06	1.70116e-05	0.289978
3	13 HetRpts	36	5159	192	39806	0.047477	0.0624698	1.37358
1	14 ZNF	4	5191	40	39958	0.813649	0.824644	0.790848
2	14 ZNF	8	5187	84	39914	0.512229	0.556771	0.756463
3	14 ZNF	1	5194	37	39961	0.121044	0.149999	0.22893
1	15 Quies	387	4808	3656	36342	4.41214e-05	7.35356e-05	0.832708
2	15 Quies	145	5050	2204	37794	4.55875e-19	1.7995e-18	0.536995
3	15 Quies	664	4531	4676	35322	0.0236991	0.0329154	1.08171
1	2 TssA	402	4793	7328	32670	3.51236e-95	3.76324e-94	0.45241
2	2 TssA	68	5127	4139	35859	8.16395e-143	1.22459e-141	0.140612
3	2 TssA	857	4338	10151	29847	5.53617e-48	3.4601e-47	0.677264
1	3 TssF	1443	3752	7346	32652	4.2143e-54	2.87339e-53	1.42828
2	3 TssF	2387	2808	12729	27269	5.75623e-88	4.79686e-87	1.37373
3	3 TssF	1218	3977	6499	33499	8.44567e-36	4.8725e-35	1.37304
1	4 TxTrans	22	5173	137	39861	0.381777	0.427363	1.20368
2	4 TxTrans	86	5109	292	39706	5.96523e-10	1.49131e-09	1.97921
3	4 TxTrans	51	5144	211	39787	0.000190907	0.00028636	1.69338
1	5 Tx	61	5134	475	39523	1	1	0.990035
2	5 Tx	28	5167	402	39596	0.000606767	0.000892304	0.566468
3	5 Tx	93	5102	556	39442	0.0255299	0.0348135	1.24659
1	6 EnhG	102	5093	207	39791	8.19071e-24	4.09536e-23	2.87162
2	6 EnhG	104	5091	267	39731	3.25313e-18	1.21992e-17	2.43863
3	6 EnhG	78	5117	137	39861	2.20531e-21	1.03374e-20	3.15603
1	7 Enh	1039	4156	3135	36863	2.61045e-144	4.89459e-143	2.16545
2	7 Enh	665	4530	2383	37615	7.5075e-64	5.63062e-63	1.89798
3	7 Enh	777	4418	2499	37499	1.04009e-93	9.75086e-93	2.0633
1	8 EnhP	343	4852	3236	36762	0.000145991	0.00022811	0.833716
2	8 EnhP	348	4847	3481	36517	5.47293e-07	1.08018e-06	0.790641
3	8 EnhP	106	5089	1310	38688	5.4233e-07	1.08018e-06	0.651221
1	9 ReprPCWk	82	5113	1449	38549	5.33232e-17	1.9044e-16	0.465934
2	9 ReprPCWk	56	5139	1059	38939	5.06473e-14	1.51942e-13	0.436917
3	9 ReprPCWk	279	4916	3093	36905	2.50942e-10	6.48988e-10	0.719784

[truncated: 4 more sheets: E10, E11, E12, E13]
